# Supplementary material
Source: PubMed Central journal article supplement (PMC5405322)

## Supplemental Figures:

**Figure 1:** Selective interactions of p300 with Atg7. Detection of the endogenous interactions between p300 and various Atg gene products using Western blot analysis. Cell lysates were prepared and subsequently immunoprecipitated using an antibody directed against either Atg7, Atg12 or with a non-specific matched IgG sera. Only Atg7 could be detected to interact with p300. Input levels (40 µg) for p300, Atg7 and Atg12 are shown. Input levels of Atg12 were detected as part of an Atg5-12 conjugate.

**Figure 2:** The effects of lysosomal protease inhibitors on LC3-II levels. A) Cells were transfected with a control RNAi or one targeting p300. Levels of autophagy were assessed by measuring p62 and LC3-II levels during fed conditions. Assessment was made in the presence or absence of lysosomal protease inhibitors (10 µg/ml of both pepstatin A and E-64d). B) Autophagy was assessed in untransfected HeLa cells during fed (-) or starved (+) conditions. Again, levels of LC3-II were assessed with and without lysosomal protease inhibitors. Under these conditions, in untransfected cells, the inhibitors do not seem to increase LC3-II levels under starved conditions nor do they increase LC3-II levels in fed p300 knockdown cells.

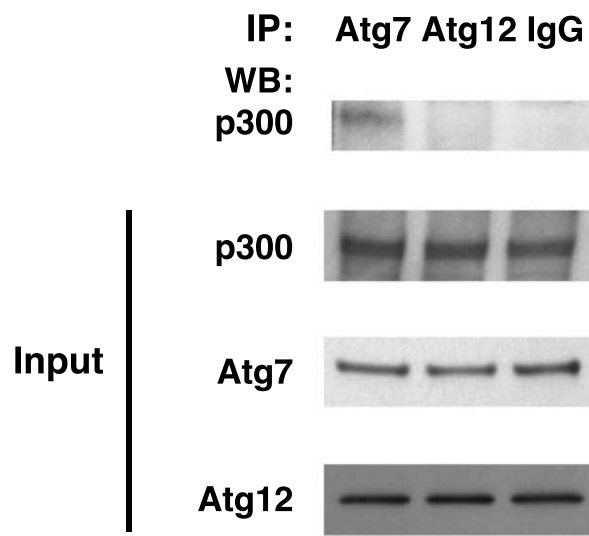

**A**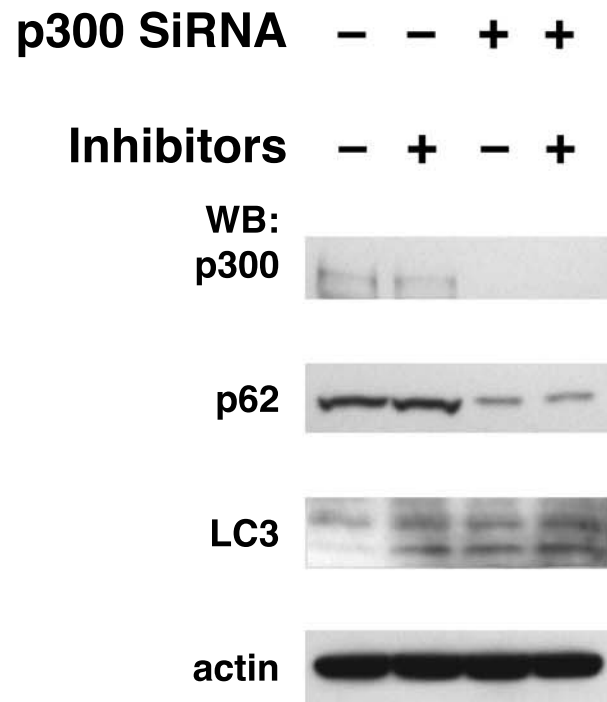**B**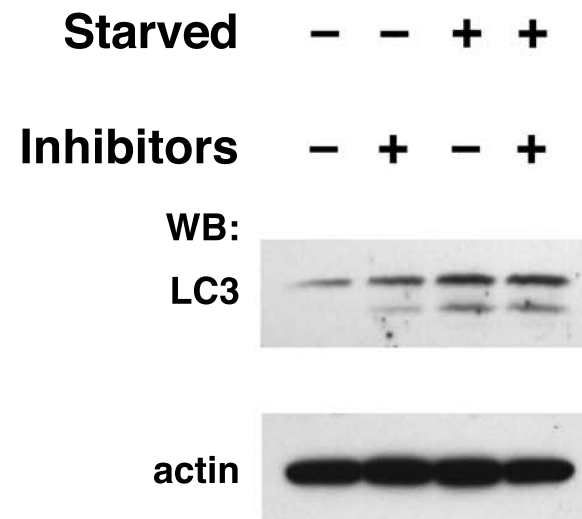

Supplement: supp_M807135200_LeeSuppFigs.pdf [file supp_M807135200_LeeSuppFigs.pdf]
